# Supplementary material for: High-throughput exploration of activity and stability for identifying photoelectrochemical water splitting materials
Source: Royal Society of Chemistry journal article supplement (doi:10.1039/d2sc05115j), 2022-01-01
Supplement: d2sc05115j1.pdf [file d2sc05115j1.pdf]

## Supplementary Information

### High-throughput exploration of activity and stability for identifying photoelectrochemical water splitting materials

Ken J. Jenewein,<sup>1,2\*</sup> Sigurd Thienhaus,<sup>3,4</sup> Attila Kormányos,<sup>1,5</sup> Alfred Ludwig,<sup>3,4</sup> and Serhiy Cherevko<sup>1\*</sup>

<sup>1</sup> Helmholtz-Institute Erlangen-Nürnberg for Renewable Energy (IEK-11), Forschungszentrum Jülich, Cauerstrasse 1, 91058 Erlangen, Germany

<sup>2</sup> Department of Chemical and Biological Engineering, Friedrich-Alexander-Universität Erlangen-Nürnberg, Egerlandstrasse 3, 91058 Erlangen, Germany

<sup>3</sup> Materials Discovery and Interfaces, Institute for Materials, Ruhr University Bochum, Universitätsstraße 150, D-44801 Bochum, Germany

<sup>4</sup> Center for Interface-Dominated High Performance Materials, Ruhr University Bochum, Universitätsstraße 150, D-44801 Bochum, Germany.

<sup>5</sup> Department of Physical Chemistry and Materials Science, Interdisciplinary Excellence Centre, University of Szeged, Aradi Square 1, Szeged, H-6720, Hungary

\*Corresponding author [k.jenewein@fz-juelich.de](mailto:k.jenewein@fz-juelich.de) [s.cherevko@fz-juelich.de](mailto:s.cherevko@fz-juelich.de)

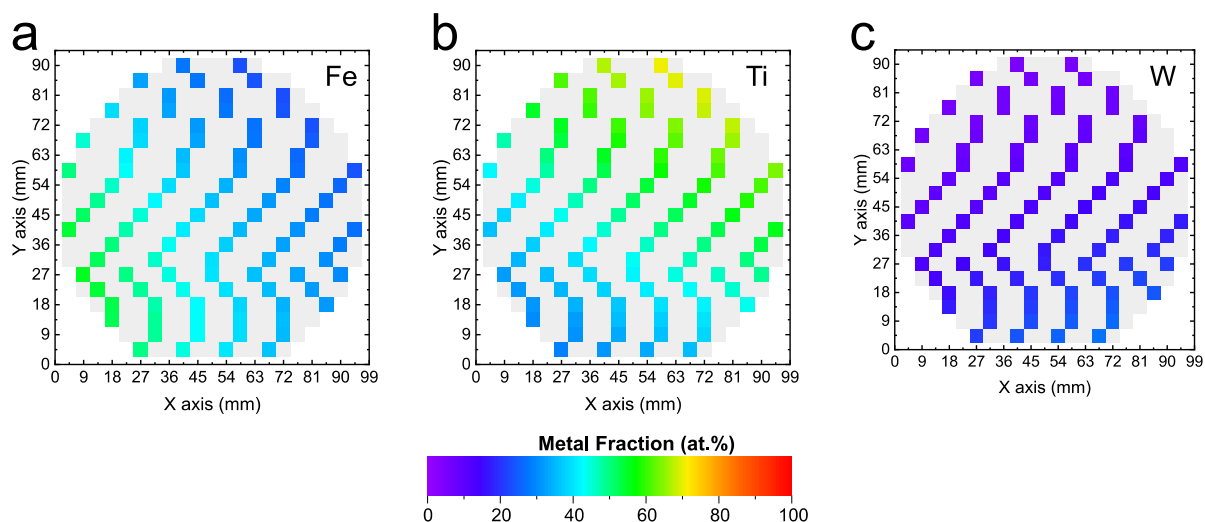

**Figure S1: HT EDX elemental mapping of the Fe-Ti-W-O material library.** (a) Fe content. (b) Ti content. (c) W content. Gray tiles represent areas within the wafer that were not subjected to the HT activity-stability screening.

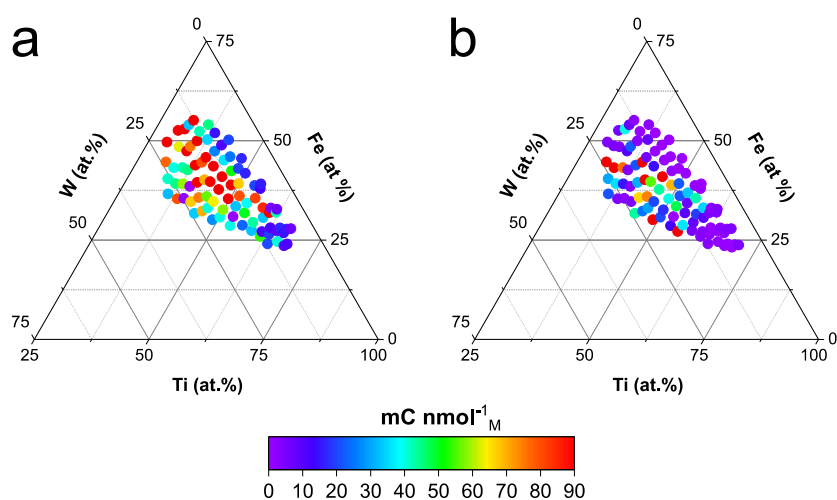

**Figure S2: Deconvoluted dissolution-normalized photocharge.** (a) Photocharge normalized by fraction-corrected Fe dissolution. (b) Photocharge normalized by fraction-corrected W dissolution.

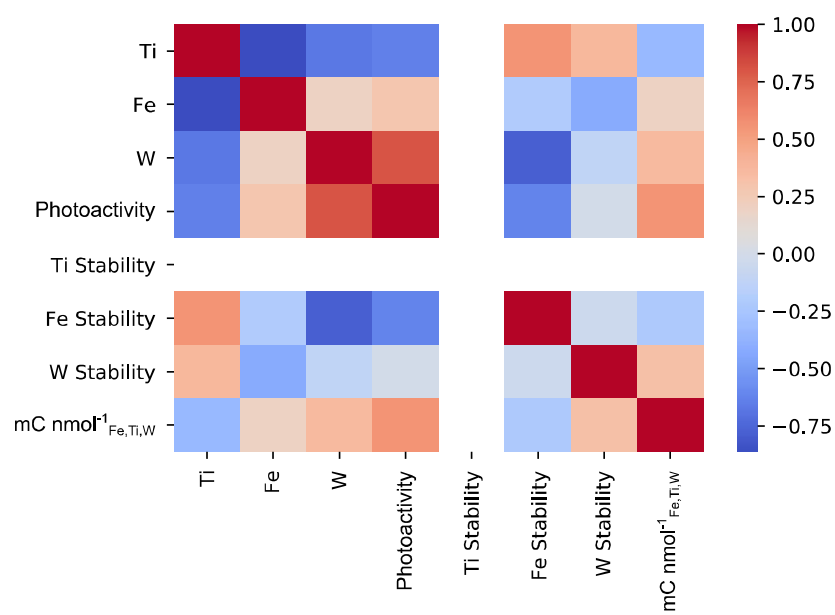

Figure S3: Heatmap showing the pairwise correlation of each variable studied in the present work

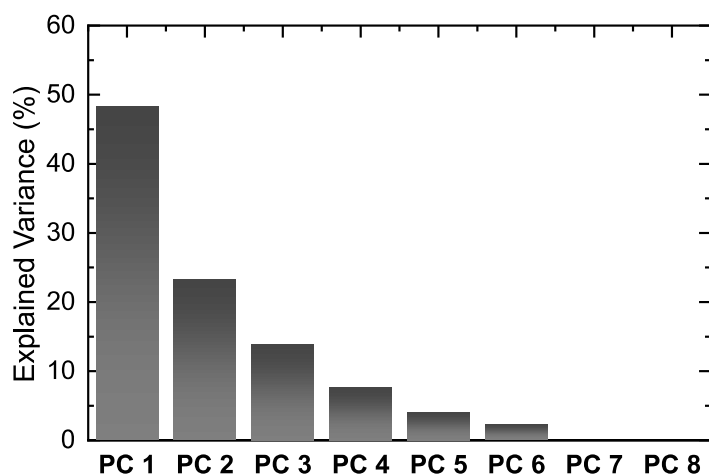

Figure S4: Scree plot for PCA
